# Supplementary material
Source: PubMed Central journal article supplement (PMC2851953)
Supplement: 0910155107_pnas.200910155SI.pdf [file 0910155107_pnas.200910155SI.pdf]

# Supporting Information

Zhang et al. 10.1073/pnas.0910155107

## SI Materials and Methods

**Morphology-Based Character State Reconstruction of Floral Symmetry.** We used maximum likelihood (ML) character state reconstruction as implemented in Mesquite version 2.6 (1) to infer the evolution of floral symmetry in Malpighiaceae and its closest relatives, Elatinaceae and Centroplacaceae. Floral morphology for 353 species was scored as either zygomorphic or actinomorphic and treated as unordered and optimized onto the rate-smoothed topology for the family (2, 3). Absolute divergence time estimates were ascertained using the methods described by Davis et al. (4, 5) and included nearly one quarter of all species of Malpighiaceae, plus numerous outgroup species of Elatinaceae and Centroplacaceae. These data were analyzed using the Mk1 model (6) with rate parameters estimated directly from the data.

**Isolation of CYCLOIDEA Homologues in Malpighiales–Oxalidaceae–Celastrales.** We used 3' RACE to obtain all *CYC* homologues, including *CYC1*, *CYC2*, and *CYC3*, across the closely related clades Malpighiales, Oxalidales, and Celastrales (7). Fresh floral tissue was collected over a broad range of developmental stages (i.e., buds from multiple developmental stages from <1 mm to mature size, and open flowers) from four species of Malpighiaceae (*Byrsonima lucida* DC., *Janusia guaranitica* A. Juss., *Malpighia coccigera* L., and *Tristellateia australasica* A. Rich.), two additional species of Malpighiales [*Hypericum perforatum* L. (Hypericaceae) and *Euphorbia milii* Des Moul. (Euphorbiaceae)], one species of Oxalidales [*Oxalis herreriae* R. Knuth (Oxalidaceae)], and one species of Celastrales [*Euonymus alatus* (Thunb.) Siebold (Celastraceae)].

Total RNAs were purified using the Concert Plant RNA Reagent (Invitrogen). Single-stranded cDNA was synthesized from 5 µg of total RNA using SuperScript II reverse transcriptase (Invitrogen) by priming with the oligonucleotide 5'-CCGGATCCTCTAGAGCGGCCGC(T)<sub>17</sub>. This poly-T primer was then used with primer 5'-AARGAYMGICAYAGYAAARAT (modified from ref. 8) for PCR. PCR products were cleaned with the QIAquick PCR purification kit (Qiagen) and used as the template in a secondary PCR with the degenerate forward primer, 5'-GCIAGRAARTTYTTYGAYYTICARGAYATG, and the poly-T primer described earlier. PCRs were performed in 100 µL of buffer [60 mM Tris-SO<sub>4</sub>, pH 8.9; 18 mM (NH<sub>4</sub>)<sub>2</sub>SO<sub>4</sub>; 2.5 mM MgSO<sub>4</sub>] containing 50 pmol 5' primer, 10 pmol poly-T primer, 25 pmol of dNTPs, and 3.75 units of PlatinumTaq polymerase (Invitrogen). The PCR amplification began with a 12-min activation step at 95 °C, followed by 37 cycles of a 1-min incubation step at 95 °C, a 30-s annealing step at temperatures ranging from 40 °C to 60 °C, and a 1-min extension at 72 °C. The reaction was terminated with a 10-min incubation at 72 °C. Gel-purified secondary PCR products were cloned using the pGEM-T easy vector system (Promega) and XL1-Blue competent cells (Stratagene). Fifty to 200 colonies for each taxon were screened by restriction site analysis and sequencing using the protocols established at Functional Biosciences. The identity of *CYC*-like genes was determined by the presence of the highly conserved TCP domain. Phylogenetic analyses including numerous TCP genes from previously published studies confirmed the identity of *CYC* homologues.

**Isolation of *CYC2*-Like Genes from Malpighiaceae–Elatinaceae–Centroplacaceae–Oxalidaceae.** Based on the *CYC*-like gene alignment, we designed degenerate primers to amplify the *CYC2*-like genes from genomic DNA. Our broad taxonomic sampling ensured that these degenerate primers covered a broad range of

sequence variation across a diverse set of taxa. One set of nested degenerate primers (i.e., the forward primer located in the TCP domain, 5'-GCIMGIAARTTYTTYGAYYTKCAA, and the reverse primer in the R domain, 5'-GCYCKYGCYCTIGCY-YTHKCYCTWGA), was selected to amplify a 350- to 400-bp fragment of the *CYC2*-like genes from Malpighiaceae and its sister clades. Gel-purified PCR products were cleaned and cloned. Fifty to 200 colonies were initially screened by restriction site analysis, and at least five clones were sequenced for each variant identified using this initial screen. Our criteria to further distinguish these variants included the degree of nucleotide variability and the presence of unique indels. Sequence variants containing no indels and differing by less than 5% sequence similarity were treated as alleles. The coding regions of *CYC2A* and *CYC2B* that fall between the TCP and R domains are 176 ± 14 and 184 ± 5 nucleotides long, respectively. *CYC1*- and *CYC3*-like genes, which were rarely amplified with *CYC2*, were distinguished by using phylogenetic analysis and excluded from subsequent consideration.

**Nucleotide Sequence Analyses.** Our analyses in the main text focused on amino acid sequence analyses. Analyses using nucleotide sequence data with third codon positions excluded, yielded a topology nearly identical to the amino acid sequence data. The parameters of the best-fit model for our nucleotide data were estimated using MODELTEST 3.06 (9). The Akaike Information Criterion (10) recommended a general time reversible model with added parameters for invariable sites and a  $\Gamma$  distribution ("GTR + I +  $\Gamma$ "). One hundred ML bootstrap replicates were conducted with the optimal model of sequence evolution. Bayesian analyses were also conducted using this model.

**Southern Hybridization.** Ten micrograms of genomic DNA was digested from *Bergia texana*, *Byrsonima crassifolia*, *J. guaranitica*, and *T. australasica* with restriction enzymes (i.e., HindIII, EcoRI, and HindIII plus EcoRI), fractionated on 0.8% agarose gels, and blotted onto a positively charged nylon membrane (GE Healthcare BioSciences). In addition, for *Janusia*, we ran lanes containing *CYC1*, *CYC2*, and *CYC3* plasmid DNA as controls to test probe efficiency and specificity.

A fragment containing the 3' end of the TCP domain and the variable region between the TCP and R domains was used as a template to synthesize probes for detecting *CYC2*-like genes (Fig. S3B). For *J. guaranitica*, a mixture of *JgCYC2A* (*CYC2A*) and *JgCYC2B-3* (*CYC2B*) sequences in equal molar concentration was used as a template to synthesize probes with <sup>32</sup>P-dCTP (Perkin-Elmer) using the Prime-It II kit (Stratagene). This gene region exhibits no more than 31% pair-wise sequence similarity among the *CYC1/2/3* paralogues, which ensures probe specificity. The hybridization was carried out in hybridization solution [900 mM NaCl; 60 mM NaH<sub>2</sub>PO<sub>4</sub>•H<sub>2</sub>O; 6 mM EDTA; 5× Denhart solution (from 50×; Amresco); 1% SDS; 10 µg/mL sheared salmon sperm DNA; pH 7.4] at 65 °C for 18 h. The membranes were then washed at low stringency (900 mM NaCl; 60 mM NaH<sub>2</sub>PO<sub>4</sub>•H<sub>2</sub>O; 6 mM EDTA; 1% SDS; pH 7.4) at 65 °C and exposed for 90 h to phosphor imaging (GE Healthcare Bio-Sciences) to detect for the presence of all *CYC2* homologues.

There are four bands for *J. guaranitica* in the EcoRI digest of the *CYC2* probe (Fig. S3A). This result is identical to our cloning experiments, which also identified four copies of *CYC2*. The *CYC1* and *CYC3* plasmid controls gave very faint signals experimentally, demonstrating that the *CYC2* probes are lineage specific. The number of bands in the EcoRI digest therefore

reflects the approximate *CYC2* copy number. In the HindIII and double digests, we expected more than four bands as a result of the presence of a restriction site within the probed region.

Given the ability of our probe to detect lineage specific *CYC2* gene copies, we conducted Southern hybridizations only for *CYC2* on the remaining taxa (i.e., *B. texana*, *B. crassifolia*, and *T. australasiae*). *BtCYC2-1* and *BtCYC2-2* of *B. texana*, *BcCYC2A* and *BcCYC2B* from *B. crassifolia*, and *TaCYC2A* of *T. australasiae* were mixed in equal molar concentrations and used as a template to synthesize our <sup>32</sup>P-labeled probes. Our *CYC2*-specific probes revealed two bands in *B. crassifolia*, one band in *T. australasiae*, and six bands in *B. texana* (see EcoRI digest in Fig. S4), which was identical to the *CYC2* copy number inferred by PCR and cloning.

**Floral Organ Arrangement in New and Old World Malpighiaceae.** New World Malpighiaceae, e.g., *B. crassifolia* and *J. guaranitica*, possess a dorsal flag/banner petal that is always innermost in bud. The remaining four petals can be arranged in one of two ways that form mirror images of each other (Fig. S5A). These enantiomorphic flowers can be found on the same inflorescence within a single species. The Old World species *T. australasiae* has a similar petal aestivation (Fig. S5B; also see main text). The innermost petal of *T. australasiae* is homologous to the New World dorsal flag/banner petal and can also initiate on the left or right side of the dorsoventral plane of symmetry (Fig. S5B). We used the relative positions of these floral organs to sample homologous tissue types from these New and Old World species, and took great care to sample only those *Tristellateia* flowers for RT-PCR in which the innermost petal was located on the left side of the dorsoventral plane of symmetry.

**Notes on the Floral Orientation of *Bergia texana* and *Bhesa paniculata*.** *B. texana* has a single dorsal petal with respect to the stem, which is uncommon relative to most angiosperms, which have one ventral petal (11, 12). Two dorsal and one ventral sepal are glandular, and two lateral sepals are eglandular (Fig. 3 in the main text). Moreover, the two dorsal sepals tightly clasp the stem, so it is relatively easy to determine that there is a single dorsal petal in *B. texana*. In Centroplacaceae, the orientation is more difficult to interpret. The flowers of *B. paniculata* are sessile, and three tightly congested flowers are commonly borne in an inflorescence. More than one kind of floral orientation was observed, in which case these flowers may twist during development.

**Character State Reconstruction of *CYC2*-Like Gene Expression.** We used ML character state optimization as implemented in Mesquite 2.6 (1) to reconstruct the evolution of *CYC2*-like gene expression. We used the single ML topology inferred from *CYC2* nucleotide sequences to reconstruct the pattern of *CYC2* gene expression under the general Mk1 model (6) with the rate parameter estimated from the data. The character states of gene expression were coded as follows: none, uniform, broad differential, and narrow differential. Ancestral character states were reconstructed assuming that all transition states are unordered. Although we used genetic distance as an approximate measure of the “opportunity for selection” (13), we also conducted our analysis with the topology calibrated for absolute divergence time estimates (4, 5, 14). Those results are very similar to those presented here and do not affect our conclusions.

- Maddison WP, Maddison DR (2009) Mesquite: a modular system for evolutionary analysis, version 2.6. Available at <http://mesquiteproject.org/mesquite/mesquite.html>. Accessed June 25, 2009.
- Zhang W, Kramer EM, Davis CC (2009) Exploring the developmental genetic basis of independent reversals in floral symmetry in Malpighiaceae. *Botany & Mycology 2009: Annual Meeting of the Botanical Society of America in Snowbird, Utah, USA*. Available at <http://2009.botanyconference.org/engine/search/index.php?func=detail&aid=851>.
- Zhang W, Kramer EM, Davis CC (2009) *CYCLOIDEA2* and the origin and maintenance of floral zygomorphy in Malpighiaceae. *Botany & Mycology 2009: Annual Meeting of the Botanical Society of America in Snowbird, Utah, USA*. Available at <http://2009.botanyconference.org/engine/search/index.php?func=detail&aid=546>.
- Davis CC, Bell CD, Mathews S, Donoghue MJ (2002) Laurasian migration explains Gondwanan disjunctions: Evidence from Malpighiaceae. *Proc Natl Acad Sci USA* 99: 6833–6837.
- Davis CC, et al. (2005) Explosive radiation of Malpighiales supports a mid-Cretaceous origin of modern tropical rain forests. *Am Nat* 165:E36–E65.
- Lewis PO (2001) A likelihood approach to estimating phylogeny from discrete morphological character data. *Syst Biol* 50:913–925.
- Stevens PF (2001 onwards) Angiosperm Phylogeny Website; version 9, June 2008. Available at <http://www.mobot.org/MOBOT/research/APweb/>. Accessed January 5, 2010.
- Howarth DG, Donoghue MJ (2005) Duplications in *CYC*-like genes from Dipsacales correlate with floral form. *Int J Plant Sci* 166:357–370.
- Posada D, Crandall KA (1998) MODELTEST: testing the model of DNA substitution. *Bioinformatics* 14:817–818.
- Akaike H (1973) Petrov BN, Csaki F, eds (1973), ed (1973) Information theory and an extension of the maximum likelihood principle. *Second International Symposium in Information Theory*, eds Petrov BN, Csaki F (Akademiai Kiado, Budapest), pp 267–281.
- Donoghue MJ, Ree RH (2000) Homoplasy and developmental constraint: A model and an example from plants. *Am Zool* 40:759–769.
- Eichler AW (1875) *Blüthendiagramme construiert und erläutert. 2 theile in 1* (W. Engelmann, Leipzig).
- Pagel M (1997) Inferring evolutionary processes from phylogenies. *Zool Scr* 26: 331–348.
- Davis CC, Fritsch PW, Bell CD, Mathews S (2004) High-latitude tertiary migrations of an exclusively tropical clade: Evidence from Malpighiaceae. *Int J Plant Sci* 165:S107–S121.
- Davis CC, Chase MW (2004) Elatinaceae are sister to Malpighiaceae; Peridiscaceae belong to Saxifragales. *Amer J Bot* 91:262–273.
- Davis CC, Anderson WR, Donoghue MJ (2001) Phylogeny of Malpighiaceae: Evidence from chloroplast *ndhF* and *trnL-F* nucleotide sequences. *Amer J Bot* 88:1830–1846.
- Wurdack KJ, Davis CC (2009) Malpighiales phylogenetics: gaining ground on one of the most recalcitrant clades in the angiosperm tree of life. *Am J Bot* 96:1551–1570.

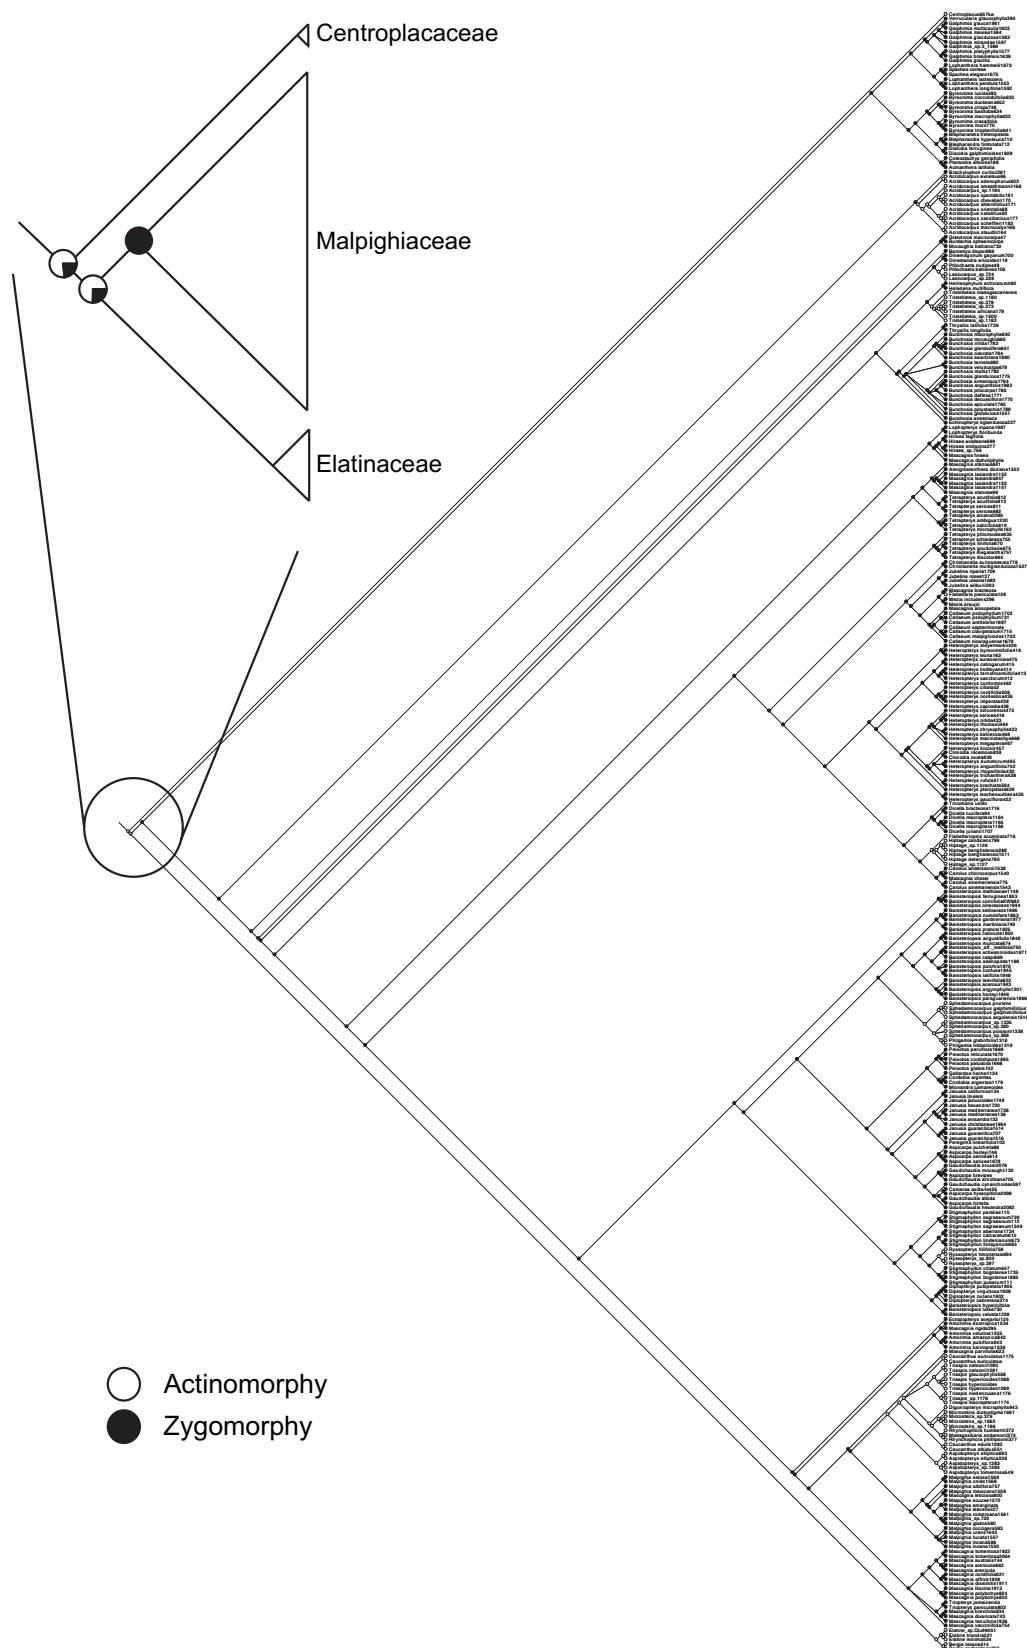

**Fig. S1.** Ancestral character state reconstruction of floral symmetry. ML analysis indicates the relative likelihood of floral symmetry at the nodes of Centroplacaceae–Elatinaceae–Malpighiaceae (actinomorphy, 0.77; zygomorphy, 0.23), Elatinaceae–Malpighiaceae (actinomorphy, 0.75; zygomorphy, 0.25), and crown group Malpighiaceae (actinomorphy, 0.0; zygomorphy, 1.0). These results indicate that the common ancestor of Centroplacaceae–Elatinaceae–Malpighiaceae and Elatinaceae–Malpighiaceae are likely actinomorphic, and that zygomorphy evolved in the common ancestor of all Malpighiaceae.

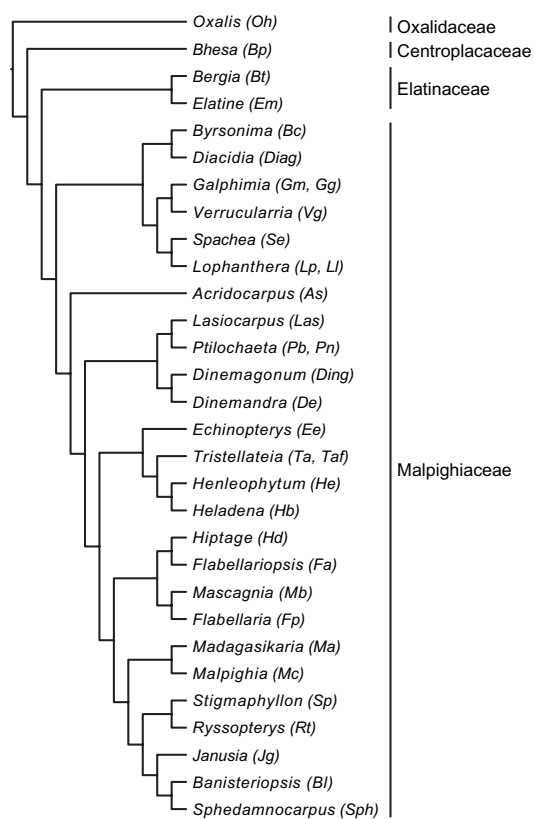

**Fig. S2.** Phylogeny showing accepted species relationships (derived from refs. 2, 3, 15–17).

A.

CYC2 Probe: *JgCYC2A* and *JgCYC2B-3*

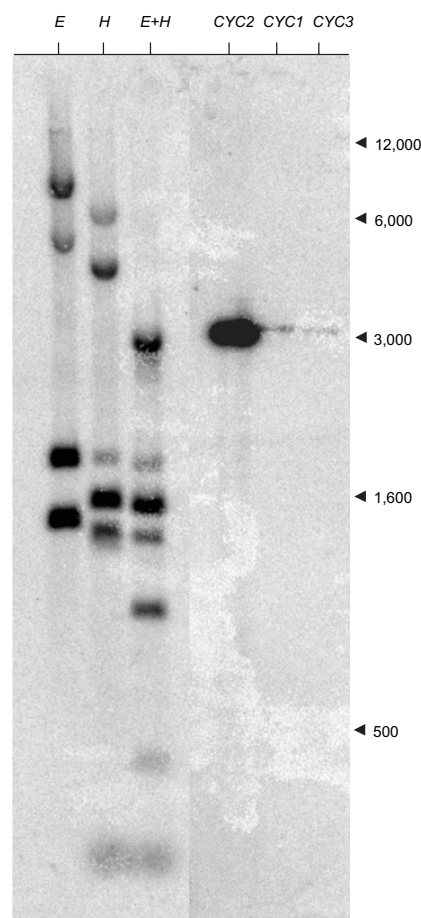

**B.**

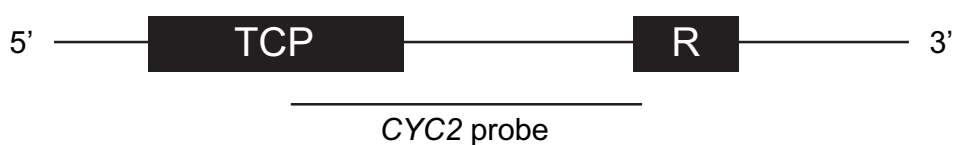

C.

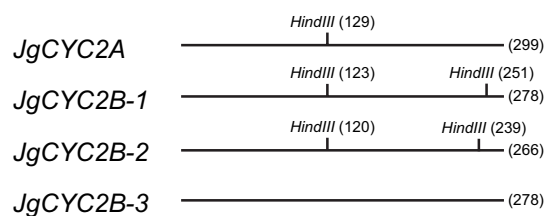

**Fig. S3.** *CYC2* Southern hybridization results for *J. guaranitica*. (A) To assess gene copy number, we developed a *CYC2*-specific probe and tested it against *J. guaranitica*. That probe preferentially identified only *CYC2* and not other *CYCLOIDEA* homologues in *Janusia*, i.e., *CYC1* and *CYC3*. The result of this test of the probe's specificity is shown on the right side of the *Janusia* blot. Restriction digests using *EcoRI* (E), *HindIII* (H), and *EcoRI* + *HindIII* (E+H) are shown for *Janusia*. (B) The position of the probe region within *CYC*-like genes. (C) Restriction cut sites were inferred from sequence analysis and are indicated on the *CYC2* gene copies shown at bottom. Arrows and numbers indicate molecular size markers (in base pairs).

A.

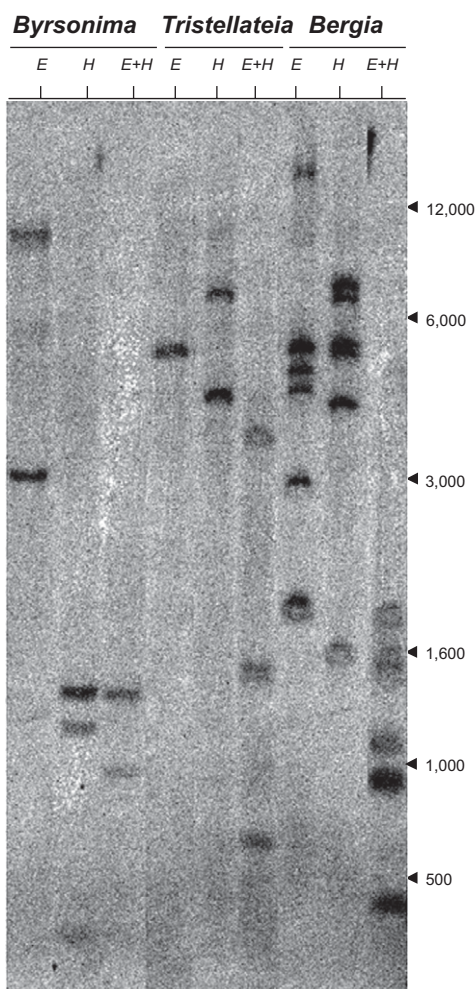

B.

***Byrsonima crassifolia***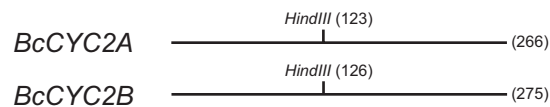***Tristellateia australasiae***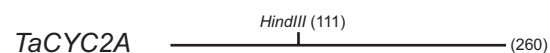***Bergia texana***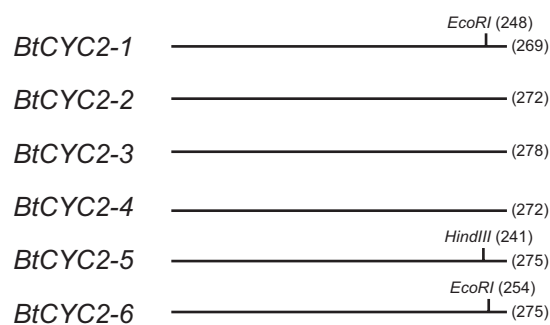

**Fig. S4.** CYC2-like gene Southern hybridization results for *Byrsonima crassifolia*, *T. australasiae*, and *Bergia texana*. (A) Restriction digests using EcoRI (E), HindIII (H), and EcoRI + HindIII (E+H) are shown for *B. crassifolia*, *T. australasiae*, and *B. texana*. (B) Restriction cut sites were determined from sequence analysis and are indicated on the CYC2 gene copies shown at bottom. Arrows and numbers indicate molecular size markers (in base pairs).

A.

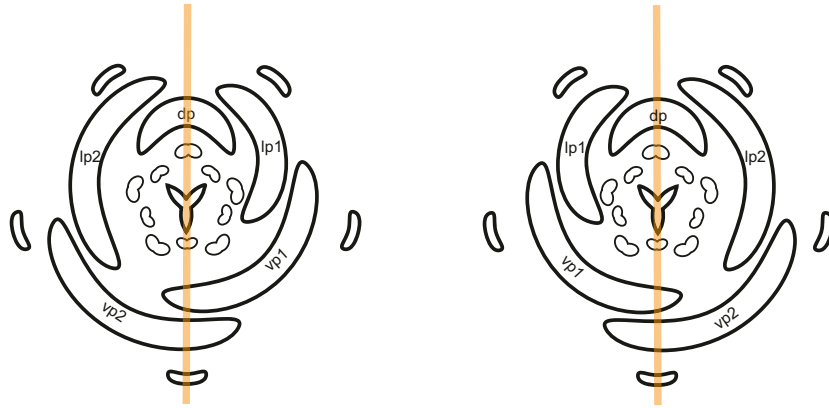

B.

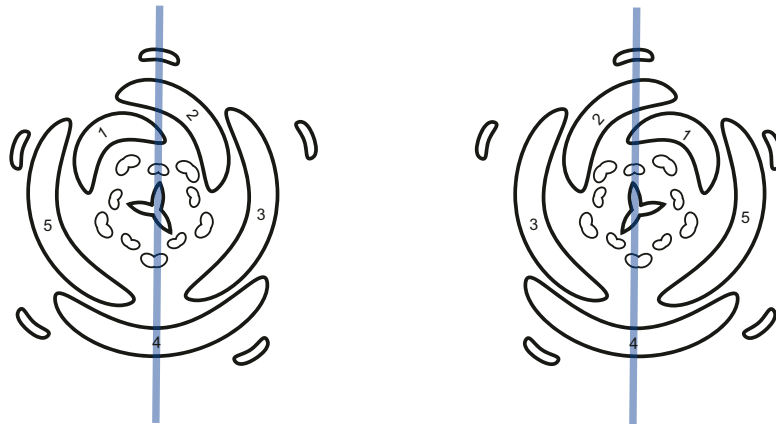

**Fig. S5.** Floral aestivation and enantiomorphism of Malpighiaceae. (A) New World Malpighiaceae. Petal identities are indicated as follows: dp, dorsal petal; lp1-2, lateral petals; vp1-2, ventral petals. (B) *T. australasiae*, an Old World Malpighiaceae species. The dorsoventral planes of floral symmetry are indicated with a colored vertical line. Petal identities are indicated as follows: 1 and 2, dorsal petals; 3 and 5, lateral petals; 4, ventral petal. The petals are not intended to be drawn proportional to scale in *Tristellateia*.

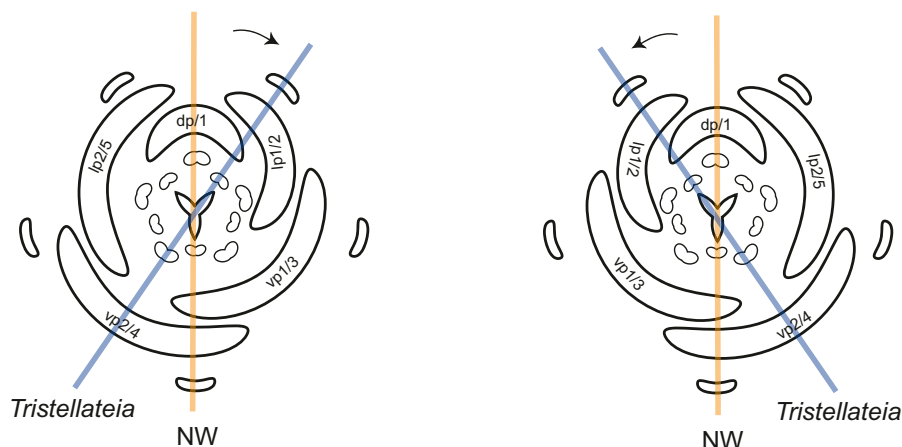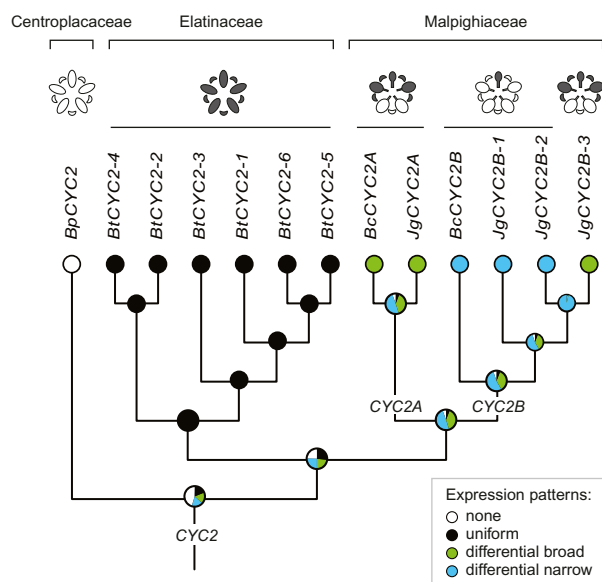

**Table S1. Species sampled, with collection locations, voucher information, and CYC2 identities**

| Species                                                | Location                        | Voucher                               | Identity of obtained CYC2 copies |                                    |                                 |
|--------------------------------------------------------|---------------------------------|---------------------------------------|----------------------------------|------------------------------------|---------------------------------|
|                                                        |                                 |                                       | 2                                | 2A                                 | 2B                              |
| <i>Acridocarpus smeathmanni</i> Guill. and Perr.       | Ghana                           | Davis 99–13 (A)                       | –                                | AsCYC2A                            | AsCYC2B                         |
| <i>Banisteriopsis latifolia</i> (A.Juss.) B. Gates     | Distrito Federal, Brazil        | Azeuedo 698 (MICH)                    | –                                | BICYC2A                            | BICYC2B-1, BICYC2B-2            |
| <i>Bergia texana</i> Seub. ex Walp.                    | Butte County, California, US    | Zhang, Ahart, and Bartholomew 84 (A)  | BtCYC2-1<br>~ BtCYC2-6           | –                                  | –                               |
| <i>Bhesa paniculata</i> Arn.                           | Negeri Sembilan, Malaysia       | Zhang and Boufford 160 (A)            | BpCYC2                           | –                                  | –                               |
| <i>Byrsonima crassifolia</i> Kunth                     | Cult. OEB, Harvard U.           | Matamoras and Cerda 301               | –                                | BcCYC2A                            | BcCYC2B                         |
| <i>Diacidia galphimoides</i> Griseb.                   | Amazonas, Venezuela             | Berry et al., 5275 (MICH)             | –                                | DiagCYC2A                          | –                               |
| <i>Dinemagonum gayanum</i> A.Juss.                     | Chile                           | Simpson 83–10–23–2c (MICH)            | –                                | DingCYC2A                          | DingCYC2B                       |
| <i>Dinemandra ericoides</i> A.Juss.                    | Chile                           | Dillon and Teillier 5103 (MICH)       | –                                | DeCYC2A                            | DeCYC2B                         |
| <i>Echinopterys eglandulosa</i> (A. Juss.) Small       | Sonora, Mexico                  | Van Devender 98–178 (MICH)            | –                                | EeCYC2A                            | EeCYC2B                         |
| <i>Elatine minima</i> (Nutt.) Fisch. & C. A. Meyer     | Gemini lake, North Michigan, US | Voss 11739 (MICH)                     | EmCYC2-1, EmCYC2-2               | –                                  | –                               |
| <i>Flabellaria paniculata</i> Cav.                     | Tanzania                        | Congdon 414 (K)                       | –                                | –                                  | FpCYC2B                         |
| <i>Flabellariopsis acuminata</i> (Engl.) R. Wilczek    | Tanzania                        | Faulkner 783 (K)                      | –                                | FaCYC2A                            | FaCYC2B-1, FaCYC2B-2            |
| <i>Galphimia gracilis</i> Bartl.                       | Fairchild T.G., Florida, US     | FTG 79–235 (FTG)                      | –                                | GgCYC2A-1, GgCYC2A-2               | GgCYC2B                         |
| <i>Galphimia mexiae</i> C.E. Anderson                  | Jalisco, Mexico                 | Anderson and Anderson 6122 (MICH)     | –                                | GmCYC2A                            | GmCYC2B                         |
| <i>Heladena bunchosoides</i> A. Juss.                  | Espírito Santo, Brazil          | Folli 4653 (MICH)                     | –                                | HbCYC2A                            | HbCYC2B                         |
| <i>Henleophytum echinatum</i> (Griseb.) Small          | nr. Havana, Cuba                | Curtiss 688 (K, NY)                   | –                                | HeCYC2A                            | HeCYC2B                         |
| <i>Hiptage detergens</i> Craib                         | Thailand                        | Middleton et al., 2095 (A, MICH)      | –                                | HdCYC2A-1, HdCYC2A-2               | HdCYC2B-1, HdCYC2B-2            |
| <i>J. guaranitica</i> A. Juss.                         | Cult. OEB, Harvard U.           | Zhang 165 (A)                         | –                                | JgCYC2A                            | JgCYC2B-1, JgCYC2B-2, JgCYC2B-3 |
| <i>Lasiocarpus</i> sp.                                 | Mexico                          | Anderson 13828 (MICH)                 | –                                | LasCYC2A                           | LasCYC2B                        |
| <i>Lophanthera longifolia</i> Griseb.                  | Amazonas, Venezuela             | Zimmerman 27 (MICH)                   | –                                | LICYC2A                            | LICYC2B                         |
| <i>Lophanthera pendula</i> Ducke                       | Amazonas, Brazil                | Lima and Lima 3185 (MICH)             | –                                | LpCYC2A                            | LpCYC2B                         |
| <i>Madagasikaria andersonii</i> C. Davis               | Madagascar                      | Davis 20–01 (A)                       | –                                | MaCYC2A                            | –                               |
| <i>Malpighia coccigera</i> L.                          | UMBG                            | UMBG 20626 (MICH)                     | –                                | McCYC2A                            | McCYC2B                         |
| <i>Mascagnia bracteosa</i> Griseb.                     | Manaus, Brazil                  | Anderson 13777 (MICH)                 | –                                | MbCYC2A                            | MbCYC2B                         |
| <i>Oxalis herrerae</i> R.Knuth                         | Cult. OEB, Harvard U.           | Zhang 20 (A)                          | OhCYC2-1, OhCYC2-2               | –                                  | –                               |
| <i>Ptilochaeta bahiensis</i> Turcz.                    | Bahia, Brazil                   | Anderson 13725 (MICH)                 | –                                | –                                  | PbCYC2B-1, PbCYC2B-2, PbCYC2B-3 |
| <i>Ptilochaeta nudipes</i> Griseb.                     | Jujuy, Argentina                | Anderson 13588 (MICH)                 | –                                | PnCYC2A                            | PnCYC2B-1, PnCYC2B-2            |
| <i>Ryssopterys timoriensis</i> (DC.) Blume ex A. Juss. | Cult. Bogor                     | XVIII.F.172 (BO)                      | –                                | RtCYC2A                            | RtCYC2B-1, RtCYC2B-2            |
| <i>Spachea elegans</i> A. Juss.                        | Guyana                          | Janson-Jacobs et al., 3907 (MICH)     | –                                | SeCYC2A                            | SeCYC2B-1, SeCYC2B-2            |
| <i>Sphedamnocarpus</i> sp.                             | Madagascar                      | Phillipson et al., 4104 (MICH, MO, P) | –                                | –                                  | SphCYC2B                        |
| <i>Stigmaphyllon paralias</i> A. Juss.                 | Bahia, Brazil                   | Anderson 13693 (MICH)                 | –                                | –                                  | SpCYC2B                         |
| <i>Tristellateia africana</i> S. Moore                 | Dar es Salaam, Tanzania         | Davis 99–25 (A)                       | –                                | TafCYC2A-1, TafCYC2A-2, TafCYC2A-3 | –                               |
| <i>T. australasiae</i> A. Rich.                        | Cult. OEB, Harvard U.           | Zhang 163 (A)                         | –                                | TaCYC2A                            | –                               |
| <i>Verrucularia glaucophylla</i> A. Juss.              | Bahia, Brazil                   | Amorim 3662 (CEPEC, MICH)             | –                                | VgCYC2A-1, VgCYC2A-2               | VgCYC2B                         |

Arnold Arboretum (Arn. Arb.) is in Jamaica Plain, MA. A, Arnold Herbarium, Harvard University Herbaria; BO, Herbarium Bogoriense, Bogor, West Java, Indonesia; CEPEC, Herbário Centro de Pesquisas do Cacau, Bahia, Brazil; FTG, Fairchild Tropical Botanic Garden; K, Royal Botanic Gardens, Kew, England; MICH, University of Michigan Herbarium; MO, Missouri Botanical Garden, St. Louis, Missouri; NY, New York Botanical Garden, Bronx, New York; P, Muséum National d'Histoire Naturelle, Paris. GenBank numbers are given for each copy found. The GenBank numbers are GU982187–GU982264.

**Table S2. RT-PCR primer sequences used in this study**

| Name                       | Taxa                         | Forward (5' to 3')             | Reverse (5' to 3')           |
|----------------------------|------------------------------|--------------------------------|------------------------------|
| <i>BtCYC2-1</i>            | <i>Bergia texana</i>         | GGTCTTACAATTCTACTAGTGAATTACTTG | GAATTCTGGAAGCAAACCTTTGTAAAT  |
| <i>BtCYC2 (-2, -4)</i>     | <i>Bergia texana</i>         | CAAGAWACTYTAGGGTTTGATAAAGCAA   | CAAATGACTCCATYTTTGAAACTGTCC  |
| <i>BtCYC2 (-3, -5, -6)</i> | <i>Bergia texana</i>         | CAAGAWACTYTAGGGTTTGATAAAGCAA   | GAATCCAMCTTTGAAACTSTTGTC     |
| <i>BpCYC2</i>              | <i>Bhesa paniculata</i>      | GATCTTCAAGACATTTCTAGGGTTTGAC   | GACTCCTTTGCAAGAAGTGTA        |
| <i>BcCYC2A</i>             | <i>Byrsonima crassifolia</i> | AAGATTGTGAGGGTTTGATAGGG        | AGGTCCTCATTTCACTATGATCAACACA |
| <i>BcCYC2B</i>             | <i>Byrsonima crassifolia</i> | AAGACTCTTAGGGTTTGATAGGG        | TCTCCCTCACTAGAATCAACAGT      |
| <i>JgCYC2A</i>             | <i>J. guaranitica</i>        | ACAATCTCTGGAGCTGAAAAGG         | ACTCACATCCTGCCTGAACC         |
| <i>JgCYC2B-1</i>           | <i>J. guaranitica</i>        | TTCCATAYTCAAGATCCGATTTA        | CTCAATTGTTCTGATGATGACCT      |
| <i>JgCYC2B-2</i>           | <i>J. guaranitica</i>        | TTCCATAYTCAAGATCCGATTTA        | CTTCCCATGATTGCGAGTAACTTATT   |
| <i>JgCYC2B-3</i>           | <i>J. guaranitica</i>        | CTAACAAAGCAGTCAAATCGAA         | GATCTCAATTGTTCTGGTGATCTT     |
| <i>TaCYC2A</i>             | <i>T. australasiae</i>       | TTAGGGTTTGACAGGGGCAAG          | GCTTAGCAAGAAGTGGGATTT        |
